# Supplementary material for: Bone marrow-derived neural crest precursors improve nerve defect repair partially through secreted trophic factors
Source: PubMed Central journal article supplement (PMC6921427; doi:10.1186/s13287-019-1517-1), 2019-12-18

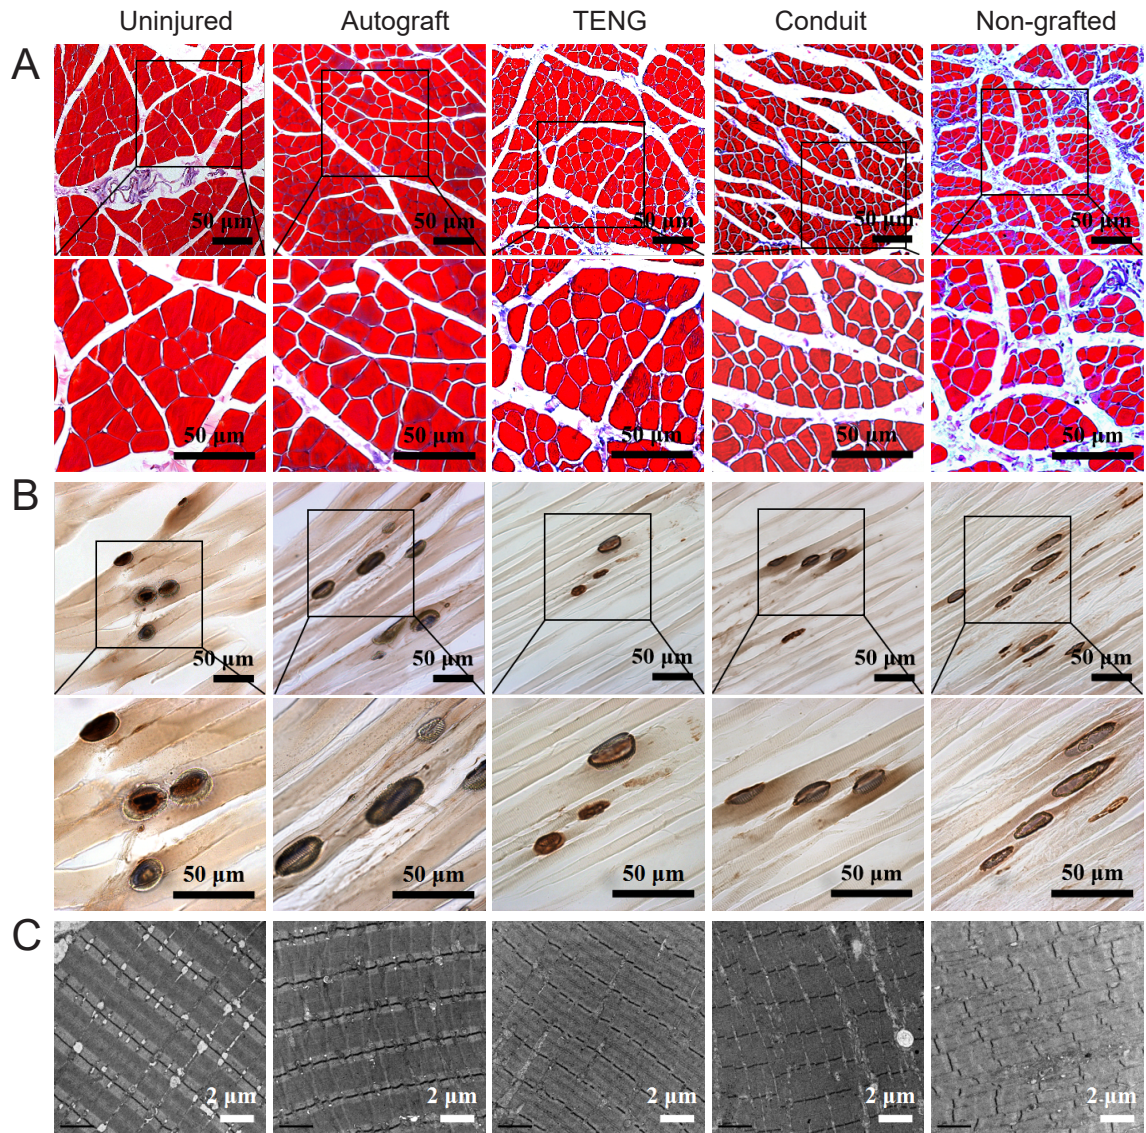

Supplement: 13287_2019_1517_MOESM2_ESM.pdf [file 13287_2019_1517_MOESM2_ESM.pdf]
